# Supplementary material
Source: PubMed Central journal article supplement (PMC7546585)
Supplement: NIHMS1629822-supplement-SI-3.pdf [file NIHMS1629822-supplement-SI-3.pdf]

## Supporting Information

---

### Comprehensive Isotopic Targeted Mass Spectrometry (CIT-MS): Reliable Metabolic Flux

#### Analysis with Broad Coverage

Xiaojian Shi<sup>1</sup>, Bowei Xi<sup>2</sup>, Paniz Jasbi<sup>1</sup>, Cassidy Turner<sup>1</sup>, Yan Jin<sup>1</sup>, Haiwei Gu<sup>1\*</sup>

<sup>1</sup>Arizona Metabolomics Laboratory, College of Health Solutions, Arizona State University,  
Scottsdale, AZ 85259, USA

<sup>2</sup>Department of Statistics, Purdue University, West Lafayette, IN 47907, USA

\*Corresponding Author:  
Haiwei Gu, PhD  
Arizona Metabolomics Laboratory  
College of Health Solutions  
Arizona State University  
13208 E. Shea Blvd  
Scottsdale, AZ 85259  
Tel: 480-301-6016  
Fax: 480-301-7017  
Email: [haiweigu@asu.edu](mailto:haiweigu@asu.edu)

---

**Separate Excel Table S1.** The in-house metabolite library containing 310 unlabeled chemical standards and their LC-MS/MS parameters.

**Separate Excel Table S2.** All isotopic MRM transitions in CIT-MS.

**Page S-3: Table S3.** Linear regression analysis of the data in **Figure 2**.

---

**Page S-4: Figure S1.** Pathway view showing only 179 (red dots) of the 310 metabolites in the detection panel.

**Page S-5: Figure S2.** Enriched carbohydrate metabolites from U-<sup>13</sup>C<sub>6</sub>-glucose that were detected by CIT-MS in a steady state study using Myc-On and Myc-Off Tet21N cells.

**Page S-6: Figure S3.** Enriched TCA cycle metabolites from U-<sup>13</sup>C<sub>6</sub>-glucose that were detected by CIT-MS in a steady state study using Myc-On and Myc-Off Tet21N cells.

**Page S-7: Figure S4.** Enriched amino acid metabolites from U-<sup>13</sup>C<sub>6</sub>-glucose that were detected by CIT-MS in a steady state study using Myc-On and Myc-Off Tet21N cells.

**Page S-8: Figure S5.** Exponential fitting of the time-course data of nucleotide metabolites for the comparison of Myc-On and Myc-Off Tet21N cells under the pseudosteady state post U-<sup>13</sup>C<sub>6</sub>-glucose labeling.

**Page S-9: Figure S6.** Exponential fitting of the time-course data of carbohydrate metabolites for the comparison of Myc-On and Myc-Off Tet21N cells under the pseudosteady state post U-<sup>13</sup>C<sub>6</sub>-glucose labeling.

**Page S-10: Figure S7.** Exponential fitting of the time-course data of TCA cycle metabolites for the comparison of Myc-On and Myc-Off Tet21N cells under the pseudosteady state post U-<sup>13</sup>C<sub>6</sub>-glucose labeling.

**Page S-11: Figure S8.** Exponential fitting of the time-course data of amino acid metabolites for the comparison of Myc-On and Myc-Off Tet21N cells under the pseudosteady state post U-<sup>13</sup>C<sub>6</sub>-glucose labeling.

---

54

**Table S3.** Linear regression analysis of the data in **Figure 2**.

| Compound                             | Linear Equation  | R <sup>2</sup> |
|--------------------------------------|------------------|----------------|
| G                                    | Y=1.0025X-0.1388 | 0.9987         |
| 1- <sup>13</sup> C-G                 | Y=0.9915X-0.5353 | 0.9996         |
| 1,6- <sup>13</sup> C <sub>2</sub> -G | Y=1.0014X-0.6499 | 0.9995         |
| U- <sup>13</sup> C <sub>6</sub> -G   | Y=0.9378X+1.7373 | 0.9981         |

55

56

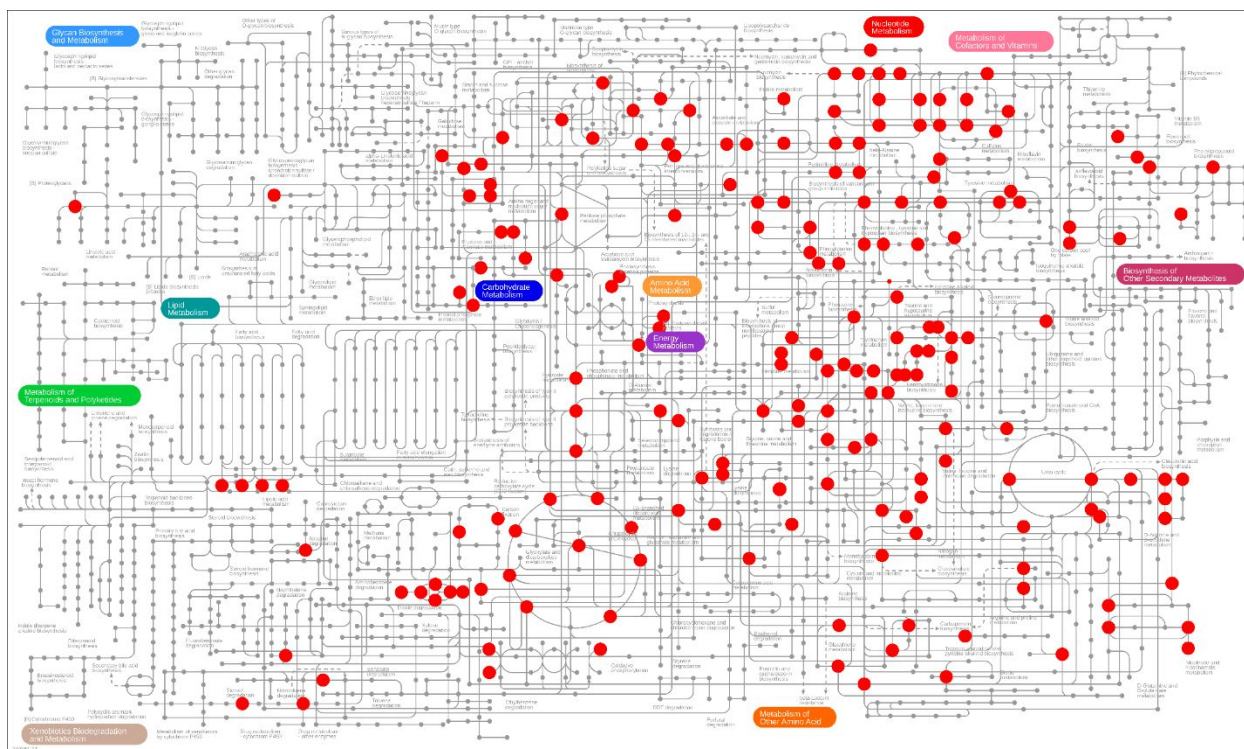

**Figure S1.** Pathway view showing only 179 (red dots) of the 310 metabolites in the detection panel.

62

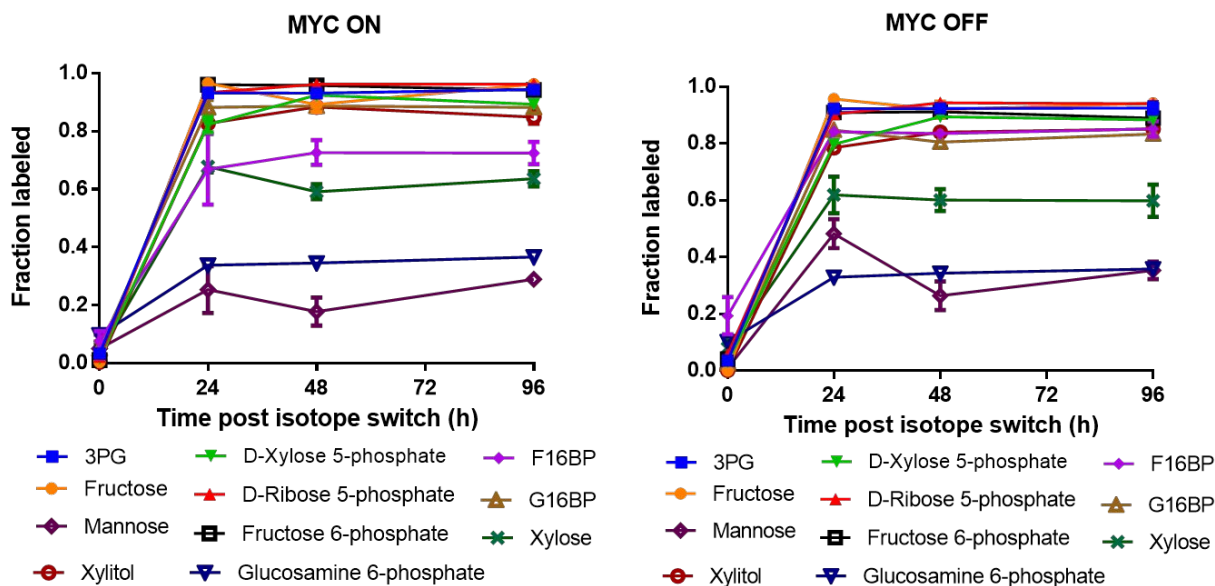

63

64

**Figure S2.** Enriched carbohydrate metabolites from U-<sup>13</sup>C<sub>6</sub>-glucose that were detected by CIT-

65

MS in a steady state study using Myc-On and Myc-Off Tet21N cells.

66

67

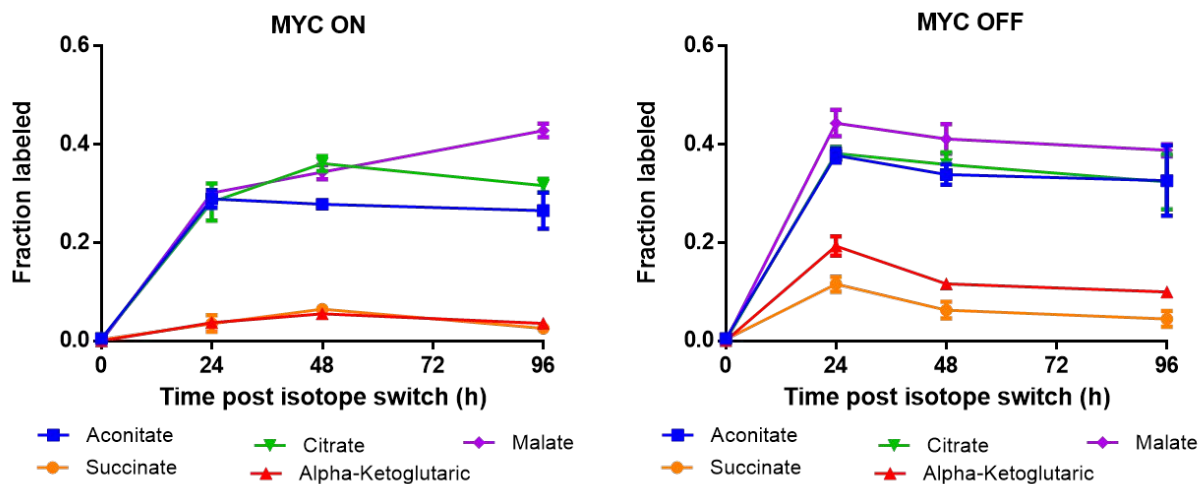

**Figure S3.** Enriched TCA cycle metabolites from U-<sup>13</sup>C<sub>6</sub>-glucose that were detected by CIT-MS in a steady state study using Myc-On and Myc-Off Tet21N cells.

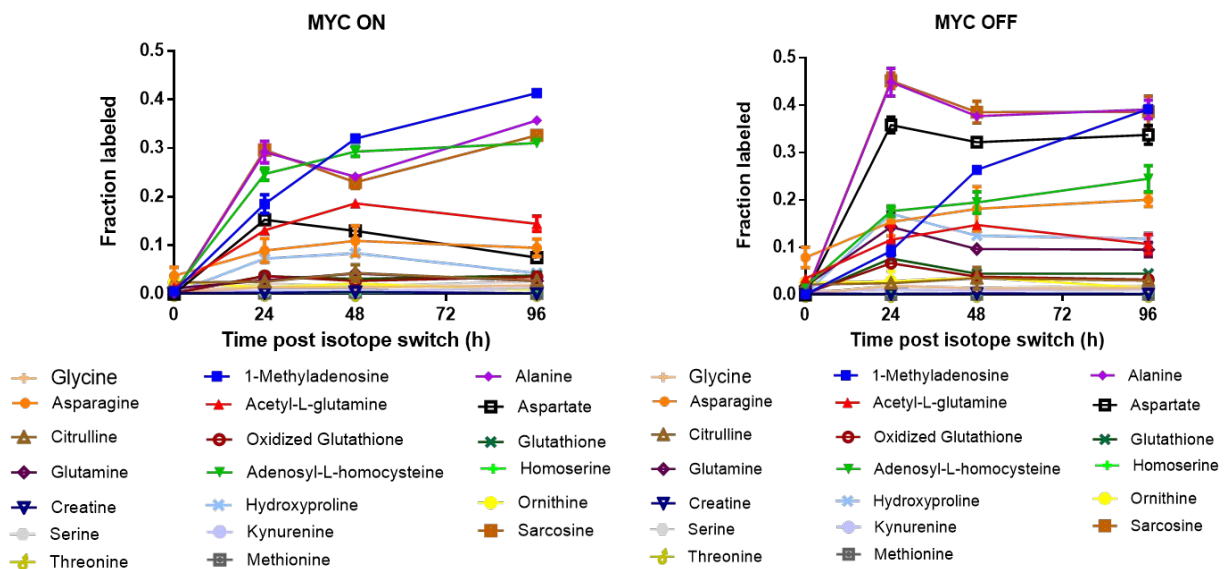

**Figure S4.** Enriched amino acid metabolites from U-<sup>13</sup>C<sub>6</sub>-glucose that were detected by CIT-MS in a steady state study using Myc-On and Myc-Off Tet21N cells.

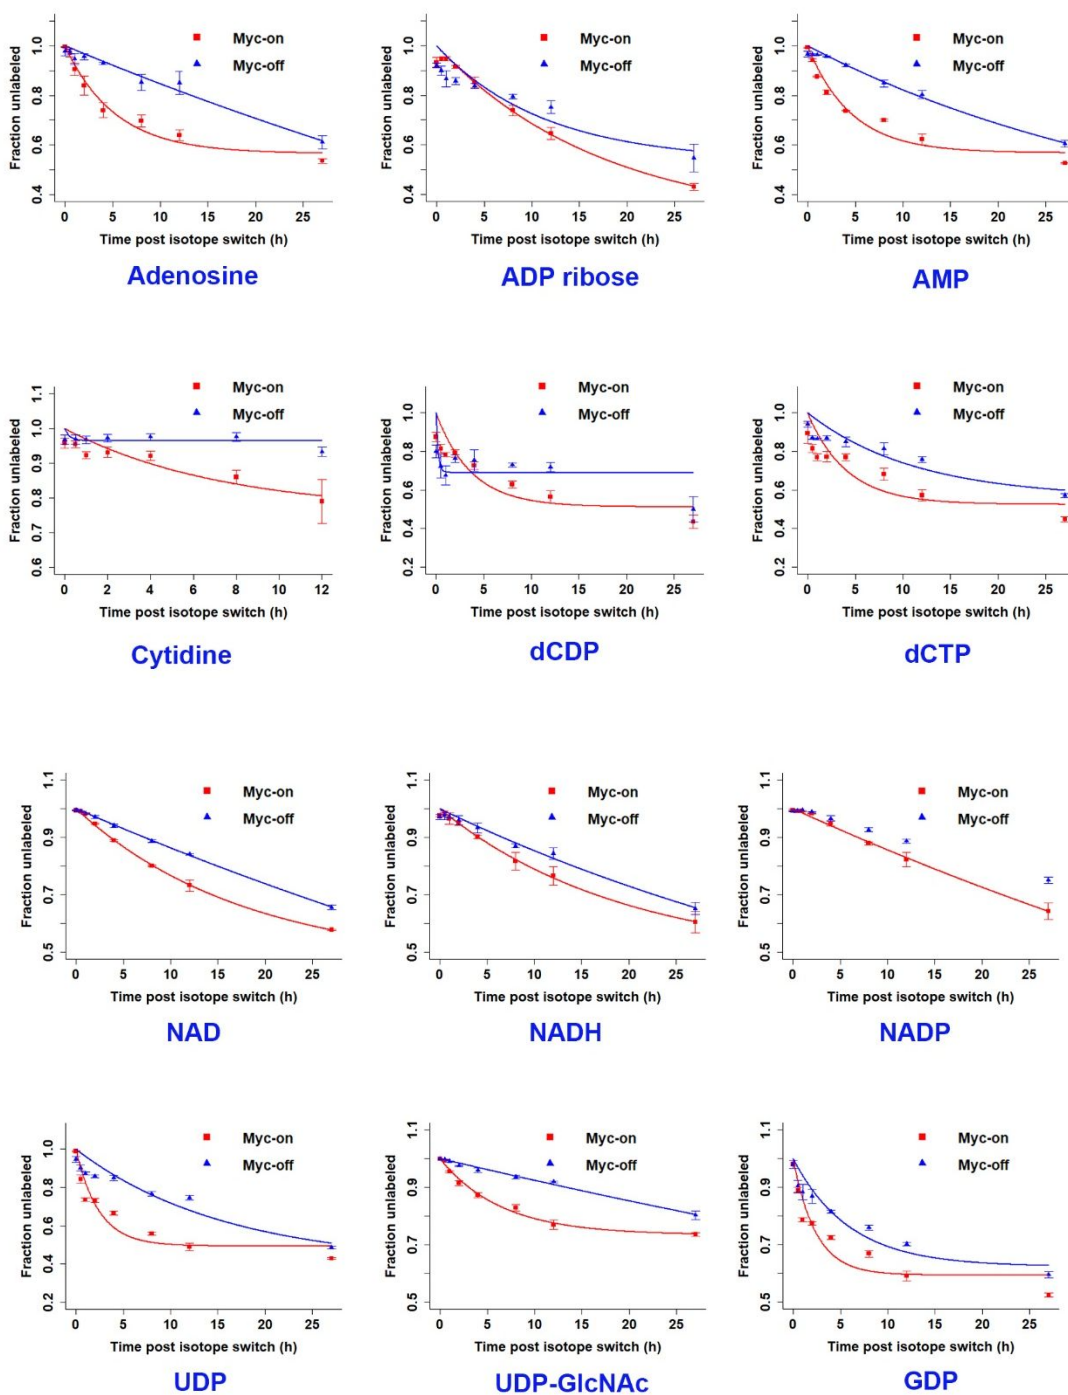

**Figure S5.** Exponential fitting of the time-course data of nucleotide metabolites for the comparison of Myc-On and Myc-Off Tet21N cells under the pseudosteady state post U-<sup>13</sup>C<sub>6</sub>-glucose labeling.

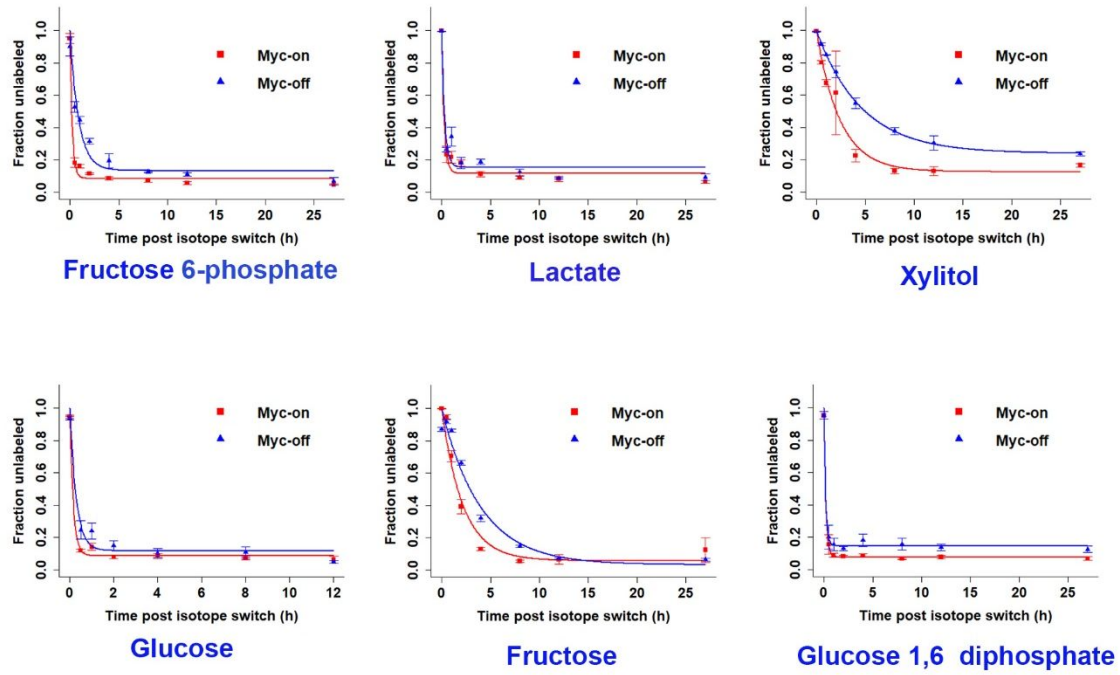

**Figure S6.** Exponential fitting of the time-course data of carbohydrate metabolites for the comparison of Myc-On and Myc-Off Tet21N cells under the pseudosteady state post  $U-^{13}C_6$ -glucose labeling.

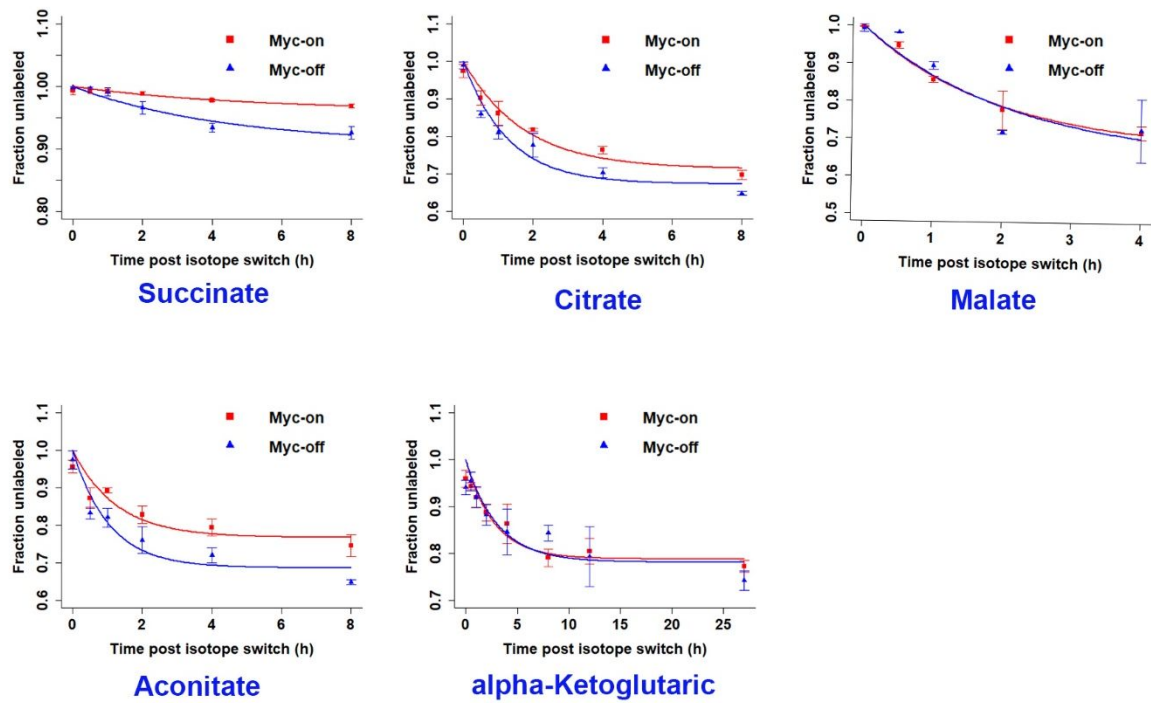

**Figure S7.** Exponential fitting of the time-course data of TCA cycle metabolites for the comparison of Myc-On and Myc-Off Tet21N cells under the pseudosteady state post U-<sup>13</sup>C<sub>6</sub>-glucose labeling.

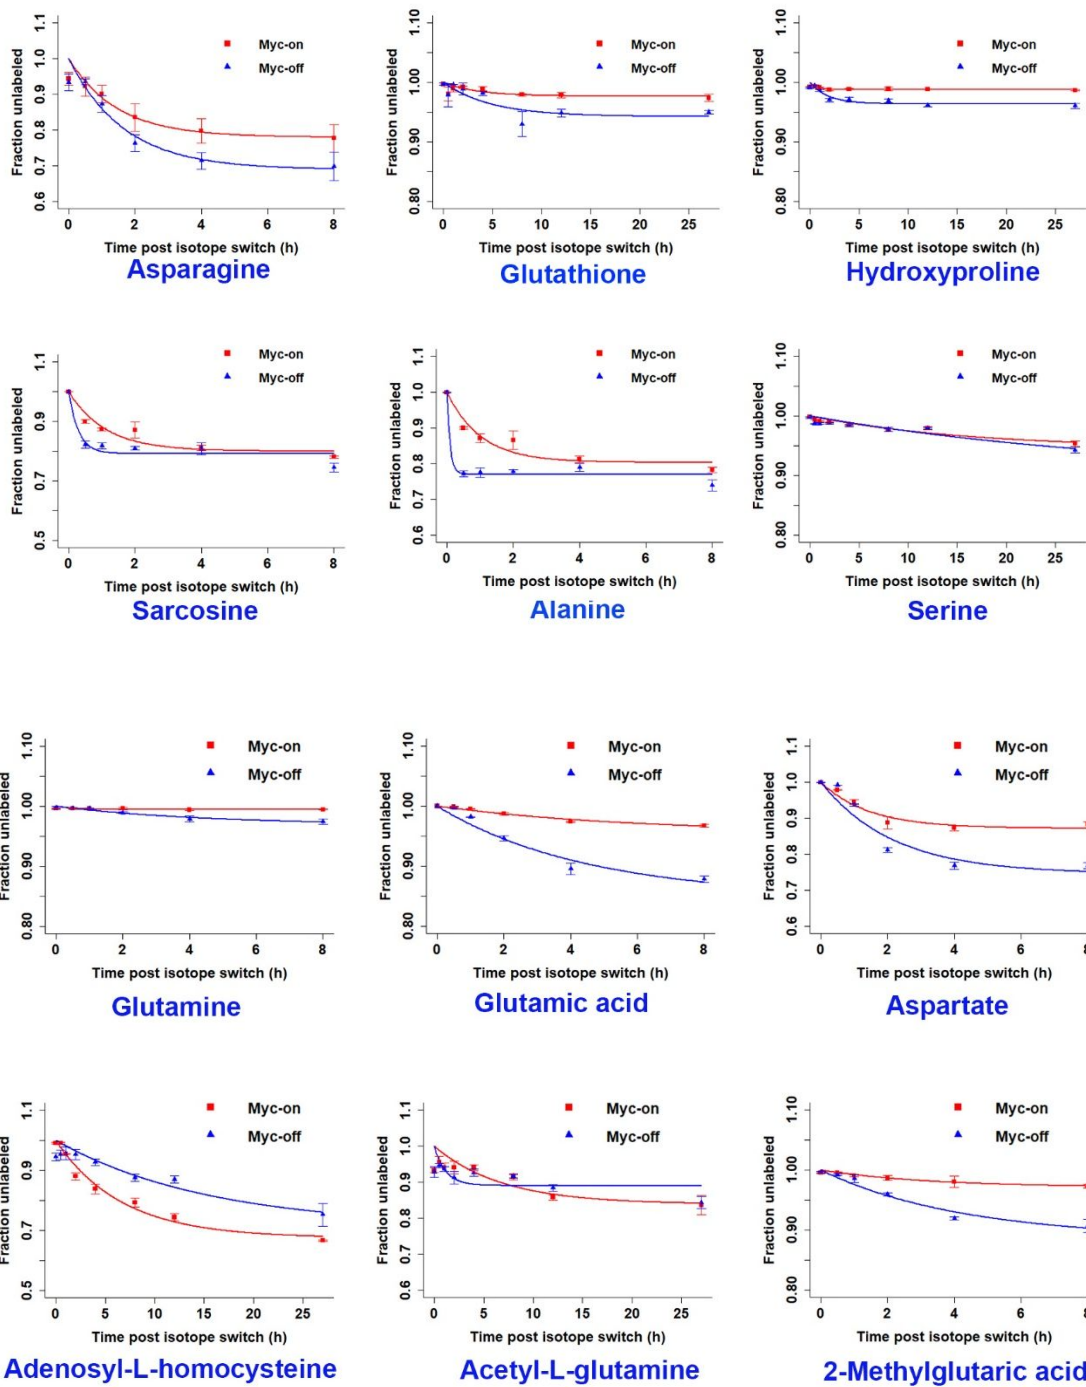

**Figure S8.** Exponential fitting of the time-course data of amino acid metabolites for the comparison of Myc-On and Myc-Off Tet21N cells under the pseudosteady state post U-<sup>13</sup>C<sub>6</sub>-glucose labeling.
